# Supplementary material for: Prostate cancer: net survival and cause-specific survival rates after multiple imputation
Source: PubMed Central journal article supplement (PMC4517373; doi:10.1186/s12874-015-0048-4), 2015-07-28

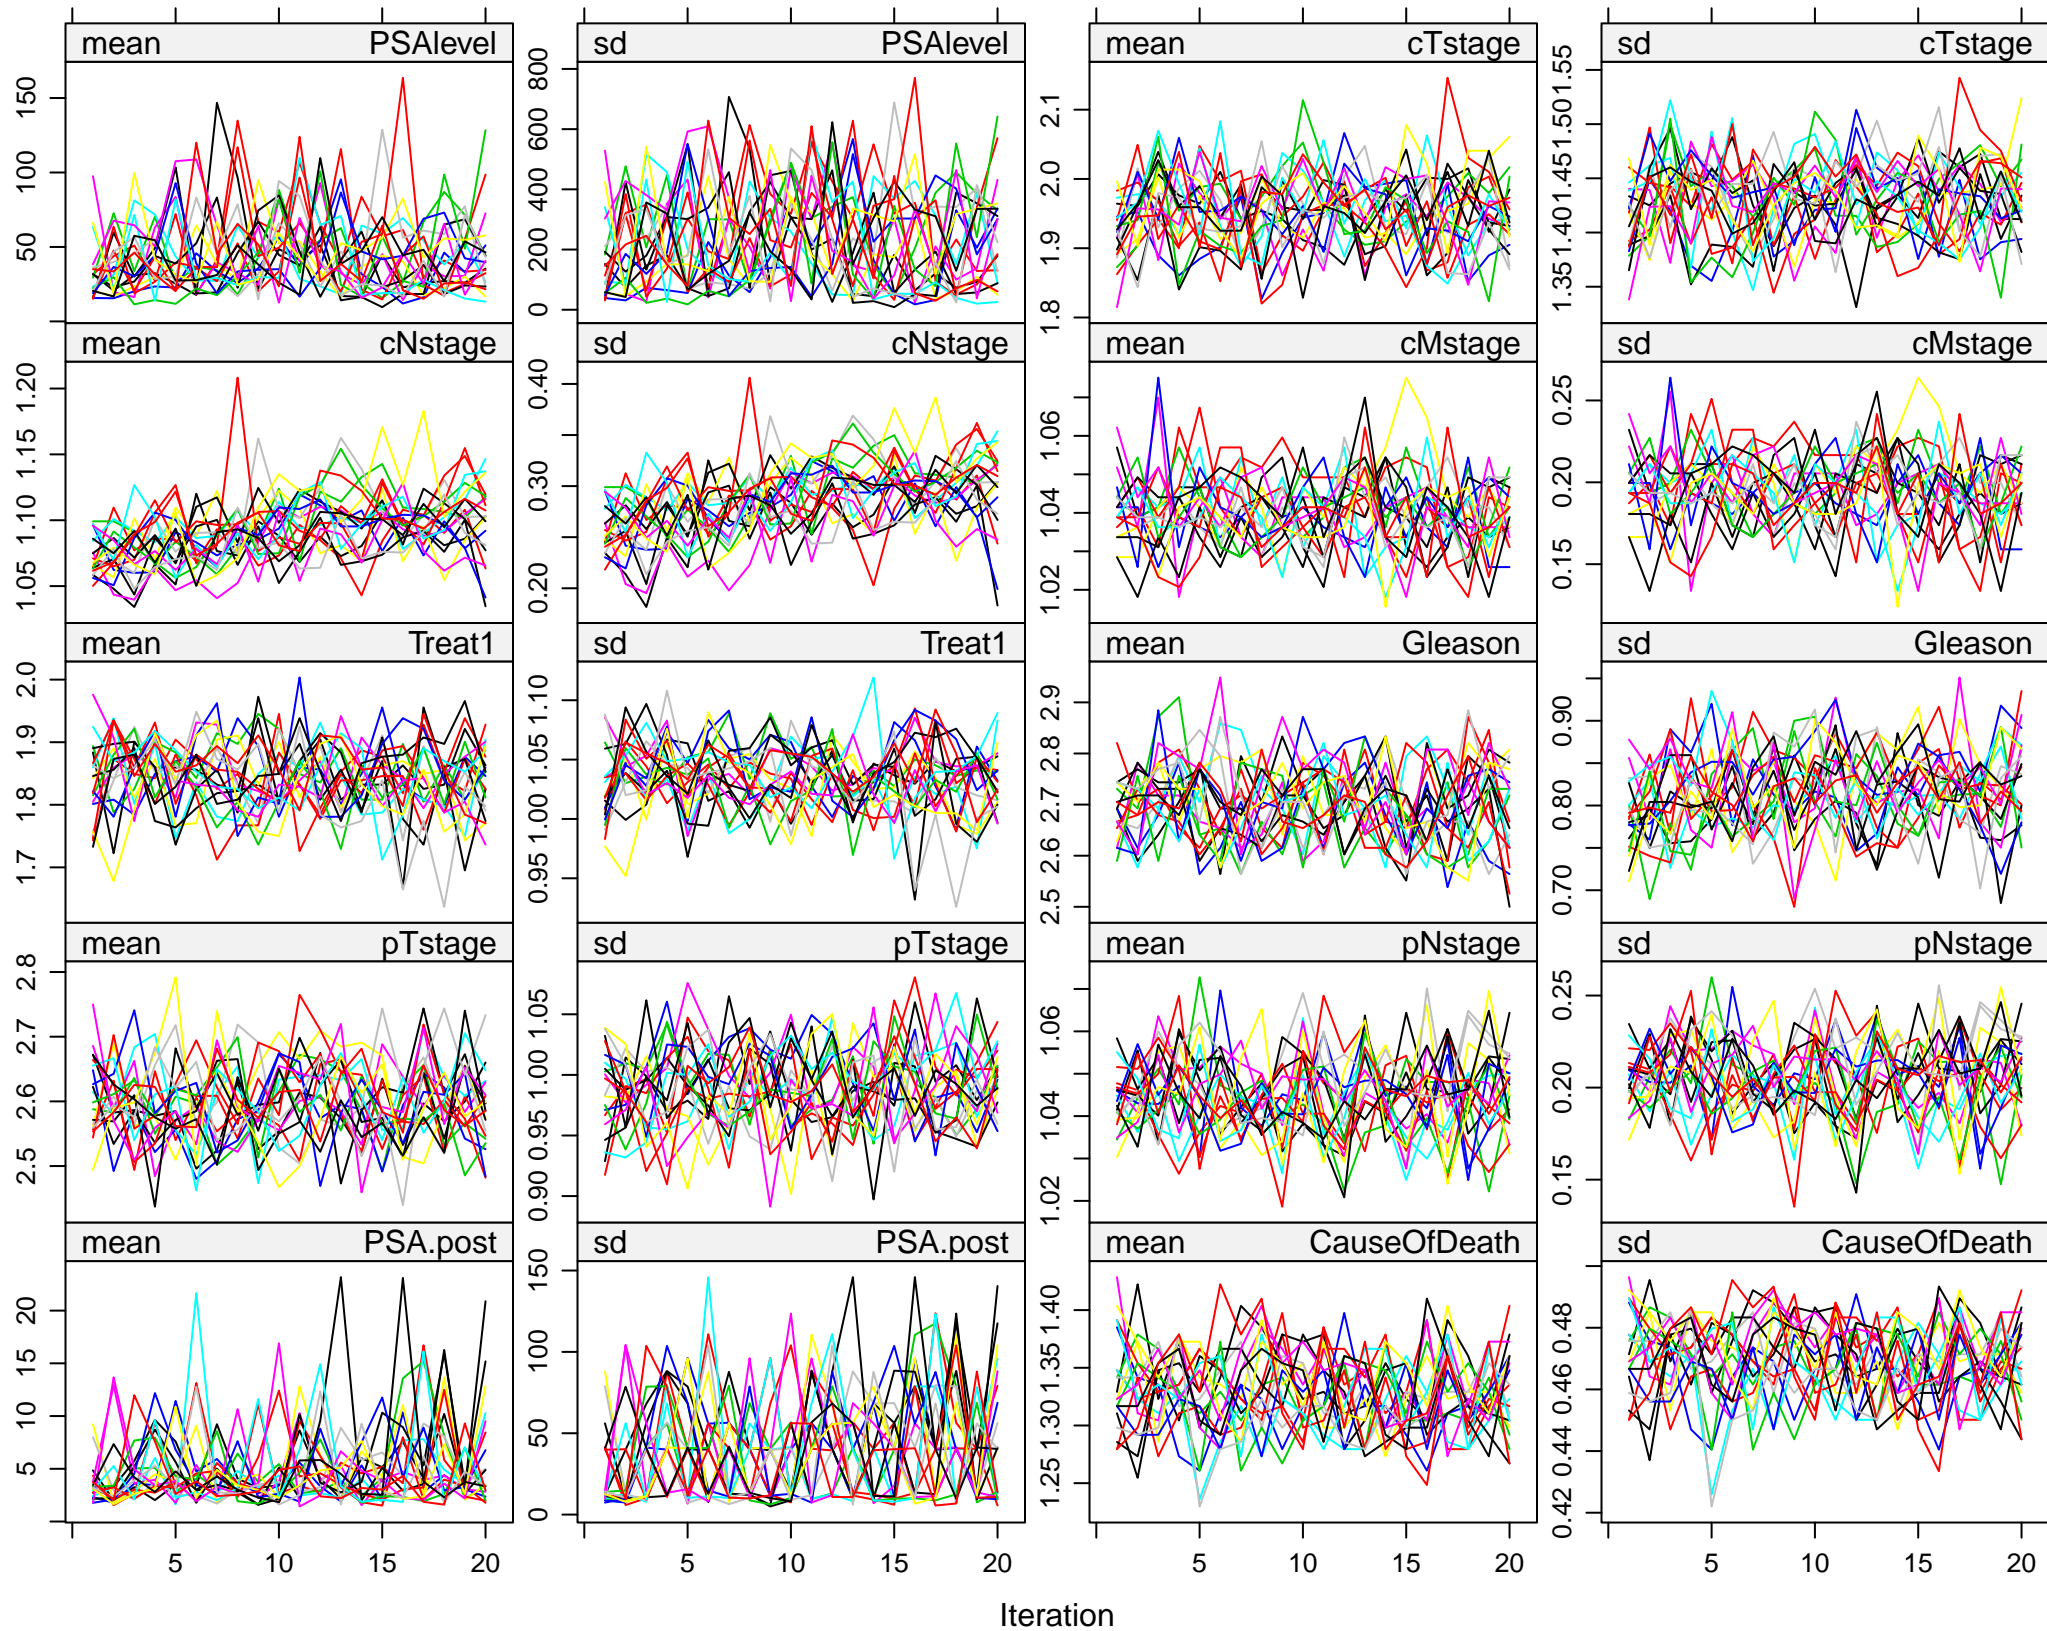

Supplement: 12874_2015_48_MOESM2_ESM.pdf [file 12874_2015_48_MOESM2_ESM.pdf]
